# Supplementary material
Source: HighWire-hosted journal article supplement (https://bmjopen.bmj.com/content/9/5/e025602)
Supplement: inline-supplementary-material-2 [file inline-supplementary-material-2.pdf]

| <b>Supplementary Table 1. Results of Simple Mediation Models</b> |                       |
|------------------------------------------------------------------|-----------------------|
|                                                                  | <b>Direct Effects</b> |
| <b>Model</b>                                                     | <b>Estimate</b>       |
| SES -> Active in the world                                       | 0.41 ***              |
| SES -> Resilience                                                | 0.14 *                |
| Active in the world -> Resilience                                | 0.19 ***              |
| Indirect effect                                                  | 0.08 ***              |
| SES -> Games                                                     | 0.05                  |
| SES -> Resilience                                                | 0.20 ***              |
| Games -> Resilience                                              | -0.06                 |
| Indirect effect                                                  | 0.00                  |
| SES -> Outdoor                                                   | 0.20 ***              |
| SES -> Resilience                                                | 0.16 ***              |
| Outdoor -> Resilience                                            | 0.20 ***              |
| Indirect effect                                                  | 0.04 **               |
| SES -> Creative                                                  | 0.11                  |
| SES -> Resilience                                                | 0.19 ***              |
| Creative -> Resilience                                           | 0.05                  |
| Indirect effect                                                  | 0.01                  |
| SES -> Religious / Spiritual                                     | 0.04                  |
| SES -> Resilience                                                | 0.19 ***              |
| Religious / Spiritual -> Resilience                              | 0.07                  |
| Indirect effect                                                  | 0.00                  |
| SES -> Exercise                                                  | 0.29 ***              |
| SES -> Resilience                                                | 0.15 **               |
| Exercise -> Resilience                                           | 0.24 ***              |
| Indirect effect                                                  | 0.07 *                |
| SES -> Passive Media Consumption                                 | -0.17 ***             |
| SES -> Resilience                                                | 0.18 ***              |
| Passive Media Consumption -> Resilience                          | -0.06                 |
| Indirect effect                                                  | 0.01                  |
| SES -> Shopping / Cooking                                        | -0.06                 |
| SES -> Resilience                                                | 0.20 ***              |
| Shopping / Cooking -> Resilience                                 | 0.14 ***              |
| Indirect effect                                                  | -0.01                 |
| SES -> Inner life                                                | 0.23 ***              |
| SES -> Resilience                                                | 0.20 ***              |
| Inner life -> Resilience                                         | -0.01                 |
| Indirect effect                                                  | 0.00                  |

† p < 0.10; \* p < 0.05; \*\* p < 0.01; \*\*\* p < 0.001

| <b>Supplementary Table 2. Penultimate SEM Mediation Model Without Including Finance as a Predictor</b> |                                        |                      |           |                  |                  |
|--------------------------------------------------------------------------------------------------------|----------------------------------------|----------------------|-----------|------------------|------------------|
| <b>Model</b>                                                                                           |                                        | <b>beta</b>          | <b>se</b> | <b>t</b>         | <b>P value</b>   |
| Predicting reserve building                                                                            | SES -> Active in the world             | 0.40                 | 0.05      | 7.66             | <b>&lt;0.001</b> |
|                                                                                                        | SES -> Outdoor activities              | 0.20                 | 0.06      | 3.42             | <b>0.001</b>     |
|                                                                                                        | SES -> Exercise                        | 0.27                 | 0.05      | 4.93             | <b>&lt;0.001</b> |
| Predicting resilience: Direct effects                                                                  | SES -> Resilience                      | 0.05                 | 0.06      | 0.86             | 0.389            |
|                                                                                                        | Active in the world -> Resilience      | 0.12                 | 0.05      | 2.41             | 0.016            |
|                                                                                                        | Outdoor activities -> Resilience       | 0.10                 | 0.05      | 2.25             | 0.024            |
|                                                                                                        | Exercise -> Resilience                 | 0.13                 | 0.05      | 2.77             | 0.006            |
|                                                                                                        | Comorbid Conditions -> Resilience      | -0.31                | 0.04      | -7.11            | <b>&lt;0.001</b> |
| Predicting resilience: Total indirect effects                                                          | SES -> Resilience                      | 0.11                 | 0.03      | 3.79             | <b>&lt;0.001</b> |
|                                                                                                        |                                        |                      |           |                  |                  |
| Predicting resilience: Specific Indirect effects                                                       | SES-> Active in the world-> Resilience | 0.05                 | 0.02      | 2.25             | <b>0.025</b>     |
|                                                                                                        | SES-> Outdoor activities-> Resilience  | 0.02                 | 0.01      | 1.87             | 0.061            |
|                                                                                                        | SES-> Exercise-> Resilience            | 0.035                | 0.015     | 2.308            | <b>0.021</b>     |
| R square                                                                                               |                                        | <b>R<sup>2</sup></b> | <b>se</b> | <b>t</b>         | <b>P value</b>   |
|                                                                                                        | Education                              | 0.60                 | 0.08      | 7.81             | <b>&lt;0.001</b> |
|                                                                                                        | Father Education                       | 0.58                 | 0.04      | 13.92            | <b>&lt;0.001</b> |
|                                                                                                        | Mother Education                       | 0.55                 | 0.04      | 13.17            | <b>&lt;0.001</b> |
|                                                                                                        | ONET                                   | 0.50                 | 0.07      | 7.05             | <b>&lt;0.001</b> |
|                                                                                                        | INCOME                                 | 0.59                 | 0.05      | 12.57            | <b>&lt;0.001</b> |
|                                                                                                        | Difficulty paying bills                | 0.51                 | 0.05      | 10.34            | <b>&lt;0.001</b> |
|                                                                                                        | Active in the world                    | 0.16                 | 0.04      | 3.83             | <b>&lt;0.001</b> |
|                                                                                                        | Outdoor activities                     | 0.04                 | 0.02      | 1.71             | <b>0.087</b>     |
|                                                                                                        | Exercise                               | 0.07                 | 0.03      | 2.46             | <b>0.014</b>     |
| Resilience                                                                                             | 0.19                                   | 0.04                 | 5.29      | <b>&lt;0.001</b> |                  |

**Model Fit Statistics:**  $\chi^2=229.1$ ,  $df=36$ ,  $p<.01$ ;  $RMSEA=.110$ ,  $CFI=0.796$ ,  $TLI=0.689$

Path coefficients are reflected by " -> "
